# Supplementary material for: Unusual electronic transport in (1 −x)Cu2Se–(x)CuInSe2hierarchical composites
Source: Royal Society of Chemistry journal article supplement (doi:10.1039/d2na00230b), 2022-01-01
Supplement: d2na00230b1.pdf [file d2na00230b1.pdf]

## Supporting Information

### **Unusual Electronic Transport in $(1-x)\text{Cu}_2\text{Se}$ - $(x)\text{CuInSe}_2$ Hierarchical Composites**

Yixuan Chen<sup>1,2</sup>, Yinying Zhang<sup>3</sup>, Ruiming Lu<sup>1</sup>, Trevor P. Bailey<sup>3</sup>, Ctirad Uher<sup>3</sup>, Pierre F. P. Poudeu<sup>1,2,\*</sup>

- 1) *Laboratory for Emerging Energy and Electronic Materials (LE<sup>3</sup>M), Department of Materials Science and Engineering, University of Michigan, Ann Arbor, MI, 48109, USA.*
- 2) *Department of Chemical Engineering, University of Michigan, Ann Arbor, MI, 48109, USA.*
- 3) *Department of Physics, University of Michigan, Ann Arbor, MI, 48109, USA*

*\*Corresponding Author: Pierre Ferdinand Poudeu Poudeu*

E-mail: [ppoudeup@umich.edu](mailto:ppoudeup@umich.edu); Fax: +1-734-763-4788

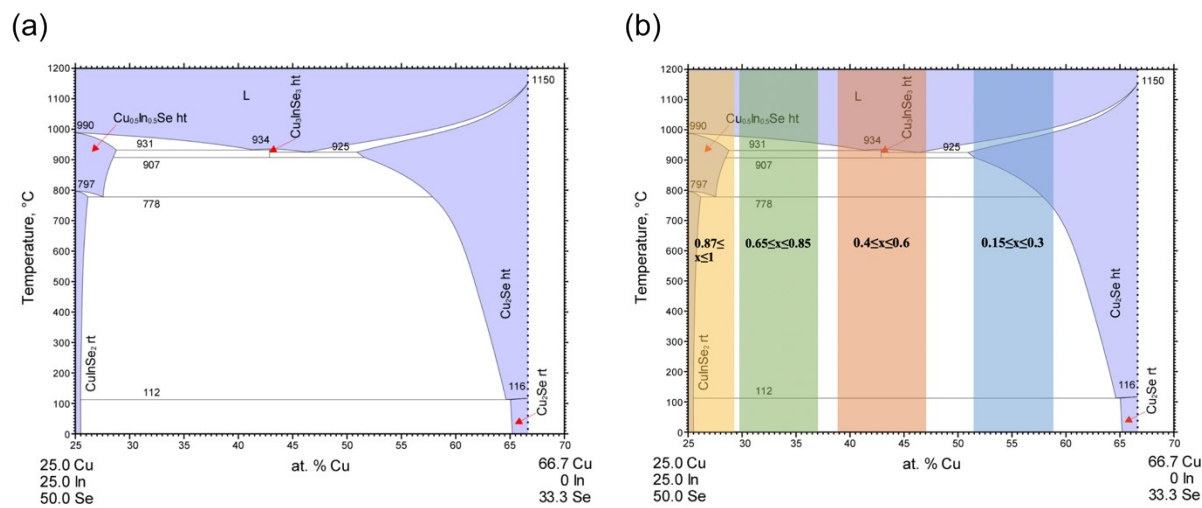

**Fig. S1** (a) Phase diagram of  $\text{Cu}_2\text{Se}$  and  $\text{CuInSe}_2$ . (b) The phase diagram is overlaid with stripes representing  $(1-x)\text{Cu}_2\text{Se}/(x)\text{CuInSe}_2$  composites with different  $x$  values.

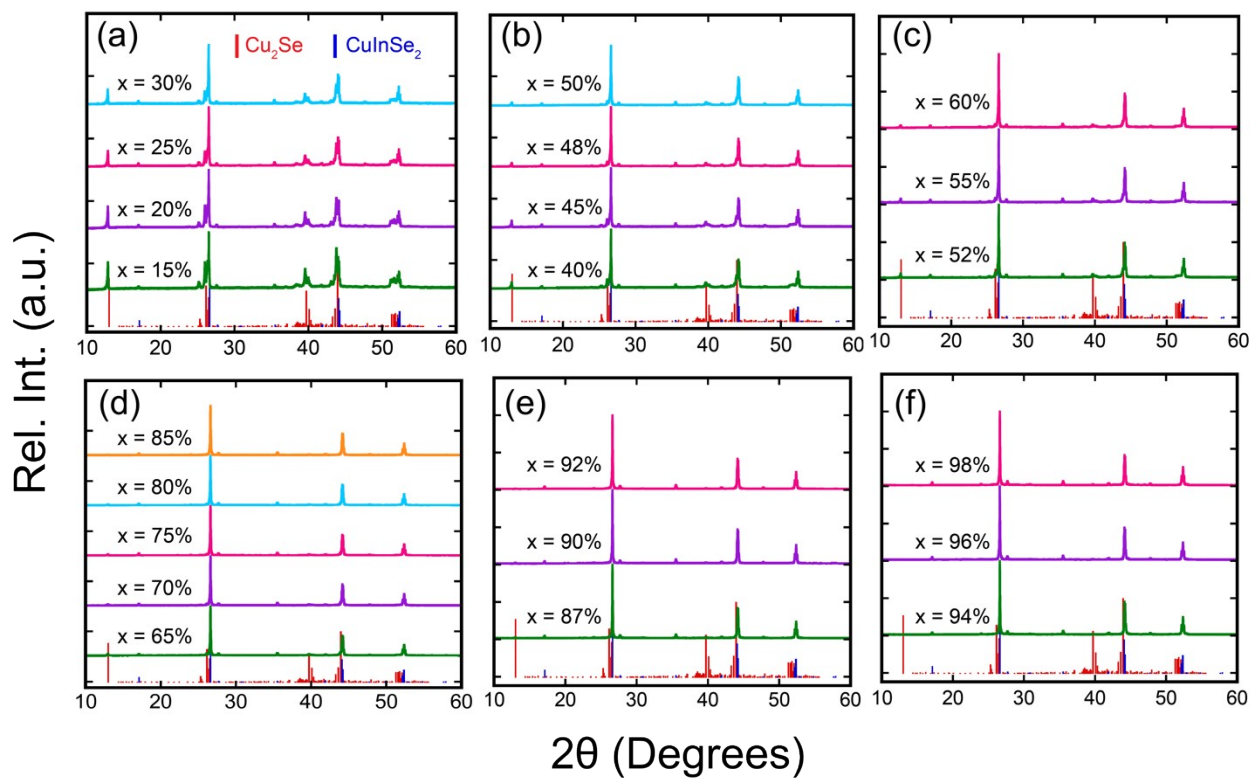

**Fig. S2** Powder X-ray diffraction (PXRD) patterns for all as-prepared  $(1-x)\text{Cu}_2\text{Se}/(x)\text{CuInSe}_2$  composites. All diffraction peaks can be indexed with  $\text{Cu}_2\text{Se}$  and  $\text{CuInSe}_2$  showing high purity of the synthesized composites. The peaks for  $\text{Cu}_2\text{Se}$  quickly diminish since  $x = 50\%$  (b) and completely disappear at  $x = 85\%$  (d).

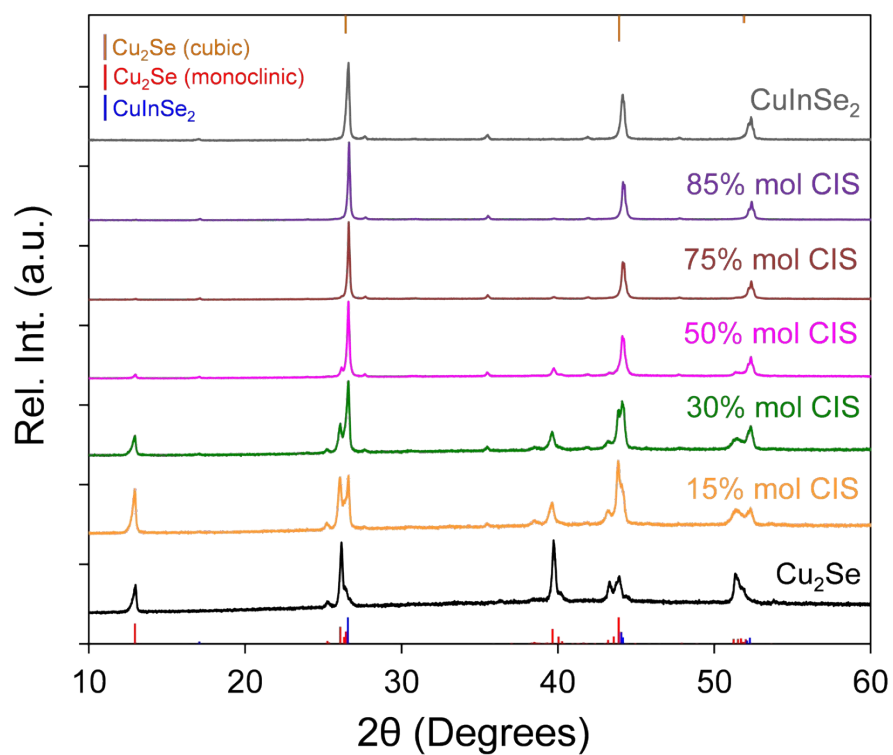

**Fig. S3** Representative X-ray diffraction patterns of hot-pressed  $(1-x)\text{Cu}_2\text{Se}/(x)\text{CuInSe}_2$  composites. No new phase is observed indicating high purity and good stability of the composites after hot press.

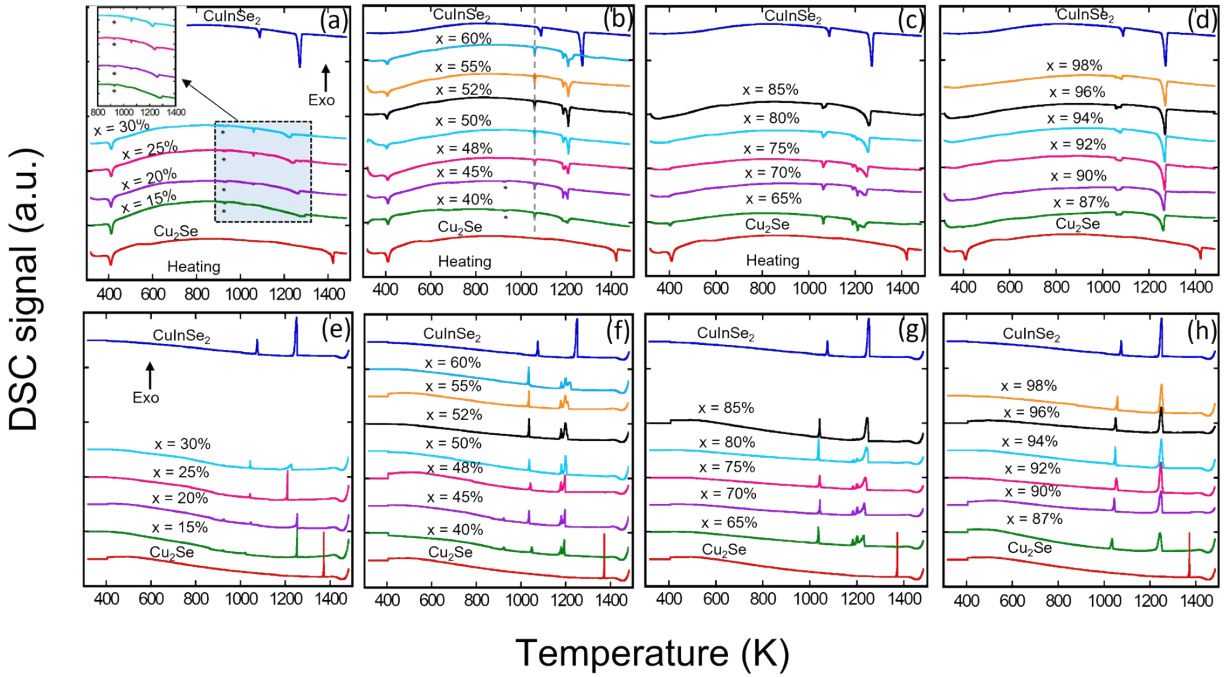

**Fig. S4** Differential scanning calorimetry (DSC) curves for all composites. (a) – (d) The major peaks on the heating curves of all composites match well with the phase diagram. The exceptional endothermic peak at  $\sim 929$  K is denoted by \*, which suggests the existence of nanoscale  $\text{CuInSe}_2$  phase. The dashed line is a guide to the eye, showing the small difference between the micron scale phase transition peak of composites and that of bulk  $\text{CuInSe}_2$ . The extinction of phase transition peak for  $\text{Cu}_2\text{Se}$  from  $x = 85\%$  also indicates it crystallizes in nanoscale. (e) – (h) Cooling curves for each sample correspond well with the heating curves with a small supercooling effect. The red and blue curves on all graphs are pure  $\text{Cu}_2\text{Se}$  and  $\text{CuInSe}_2$  synthesized for comparison.

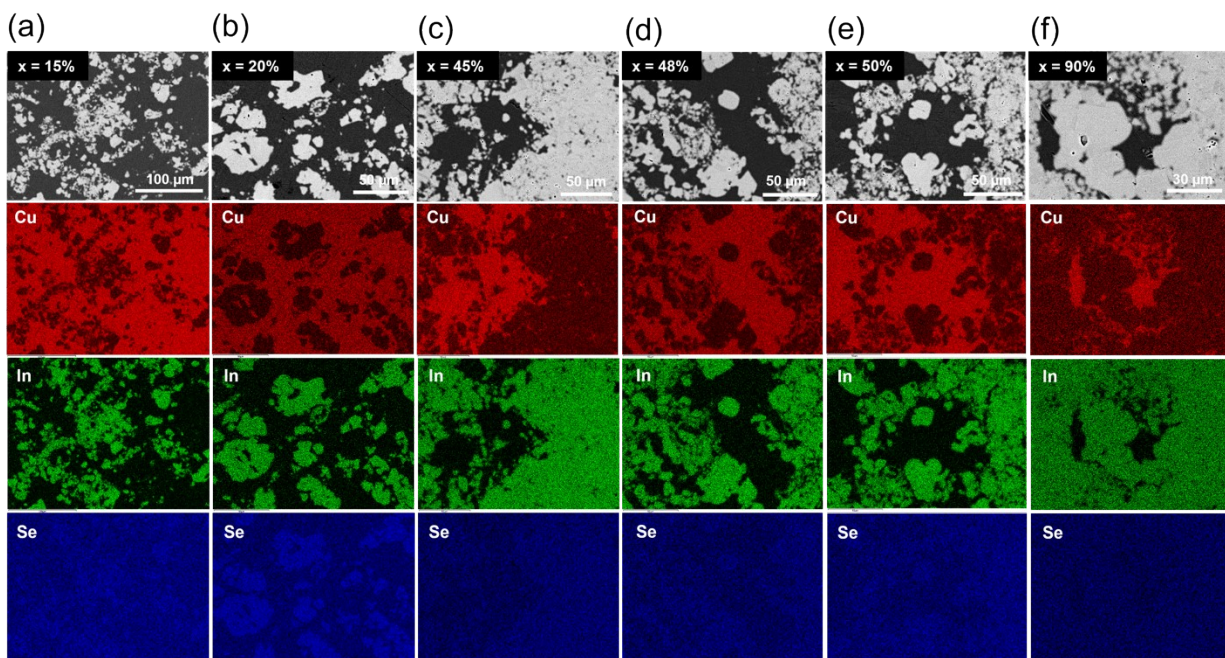

**Fig. S5** EDS mapping of selected  $(1-x)\text{Cu}_2\text{Se}/(x)\text{CuInSe}_2$  composites. (a)  $x = 15\%$ ; (b)  $x = 20\%$ ; (c)  $x = 45\%$ ; (d)  $x = 48\%$ ; (e)  $x = 50\%$ ; (f)  $x = 90\%$ . The location and relative size of the  $\text{CuInSe}_2$  particles in various sample can be clearly tracked following the distribution of In (green) and Se (blue) elements. Likewise, the  $\text{Cu}_2\text{Se}$  phase is also distinguishable following the distribution of Cu (red) element.

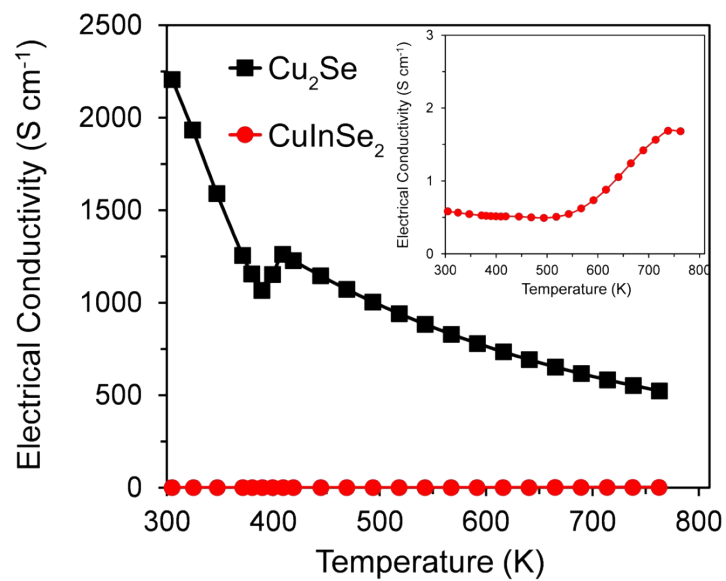

**Fig. S6** Temperature-dependent electrical conductivity of  $\text{Cu}_2\text{Se}$  and  $\text{CuInSe}_2$ .  $\text{Cu}_2\text{Se}$  behaves like a heavily doped degenerate semiconductor, while  $\text{CuInSe}_2$  generally shows the characteristic of an intrinsic semiconductor.

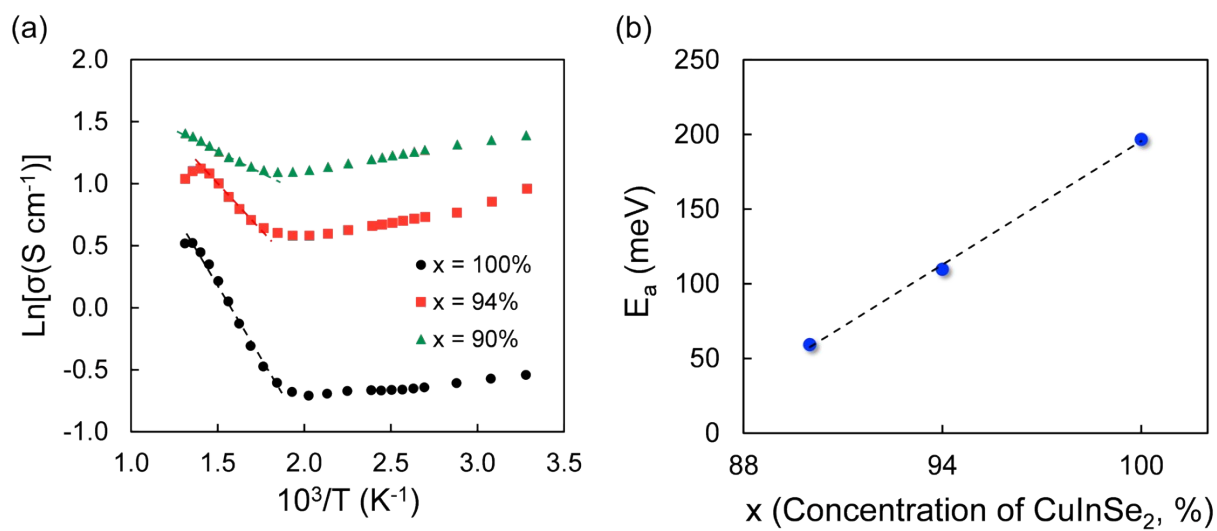

**Fig. S7** (a) Arrhenius plot of  $\ln(\sigma)$  versus  $10^3/T$ , giving linear slopes which are used to obtain activation energy of carriers. (b) Variation of the activation energy with the content of  $\text{CuInSe}_2$ , showing a linear decrease with added  $\text{Cu}_2\text{Se}$ .



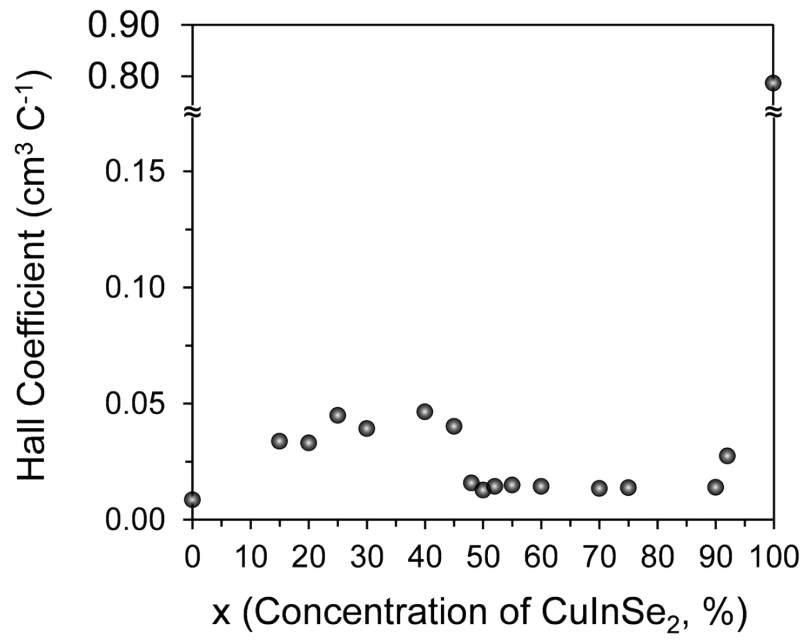

**Fig. S8** Measured Hall coefficient of selective samples at 300 K. All samples show positive Hall coefficients, indicating that free holes are the dominant carriers in the composites.

| Sample         | Cu <sub>2</sub> Se phase |          |          | CuInSe <sub>2</sub> phase |          |          |
|----------------|--------------------------|----------|----------|---------------------------|----------|----------|
|                | Cu (At%)                 | Se (At%) | In (At%) | Cu (At%)                  | Se (At%) | In (At%) |
| 0.85CS/0.15CIS | 66.45                    | 33.48    | 0.05     | 28.05                     | 47.93    | 23.98    |
| 0.52CS/0.48CIS | 65.44                    | 34.38    | 0.17     | 26.37                     | 49.65    | 23.98    |
| 0.50CS/0.50CIS | 65.71                    | 34.23    | 0.03     | 26.58                     | 49.51    | 23.91    |
| 0.10CS/0.90CIS | 63.45                    | 36.55    | 0        | 25.48                     | 50.32    | 24.18    |

**Table S1** Atomic concentration of each element in both phases of  $(1-x)\text{Cu}_2\text{Se}/(x)\text{CuInSe}_2$  composites, determined by EDS point analysis. For each value, at least 10 different points in distinct regions were collected and averaged.
